# Supplementary material
Source: publisher figshare collection journal article supplement (https://acs.figshare.com/ndownloader/files/27413572)
Supplement: Supplementary file 1 [file 27413572]

## Supplementary information for:

### Phonons and Adsorption-Induced Deformations in ZIFs: Is It Really a Gate Opening?

Filip Formalik<sup>1,2\*</sup>, Bartosz Mazur<sup>1</sup>, Michael Fischer<sup>3,4</sup>, Lucyna Firlej<sup>1,5</sup>, Bogdan Kuchta<sup>1,6</sup>

1. Department of Micro, Nano and Bioprocess Engineering, Faculty of Chemistry, Wrocław University of Science and Technology, Wrocław, Poland
2. Department of Theoretical Physics, Faculty of Fundamental Problems of Technology, Wrocław University of Science and Technology, Wrocław, Poland
3. Crystallography Group, Faculty of Geosciences, University of Bremen, Bremen, Germany
4. MAPEX Center for Materials and Processes, University of Bremen, Bremen, Germany
5. Charles Coulomb Laboratory, University of Montpellier, Montpellier, France
6. MADIREL, CNRS, Aix-Marseille University, Marseille, France

**Table S1.** Experimental symmetry groups and lattice parameters of studied ZIFs, compared with corresponding values obtained from geometry optimization. Numbers in brackets in the space group columns refer to the International Tables of Crystallography A.

| Framework    | Space group (exp.) | Lattice parameters (exp.) (Å) | Ref. | Space group (DFT) | Lattice parameters (DFT) (Å) |
|--------------|--------------------|-------------------------------|------|-------------------|------------------------------|
| ZIF-8        | I4-3m (217)        | a = 16.9900                   | [1]  | I23 (197)         | a = 17.0239                  |
| SALEM-2      | I4-3m (217)        | a = 16.8303                   | [2]  | I4-3m (217)       | a = 16.9600                  |
| ZIF-8(amino) | -                  | -                             | -    | I4-3m (217)       | a = 16.8483                  |
| ZIF-65       | -                  | -                             | -    | I4-3m (217)       | a = 17.4288                  |
| ZIF-90       | I4-3m (217)        | a = 17.2715                   | [3]  | I23 (197)         | a = 17.1748                  |
| CdIF-1       | I4-3m (217)        | a = 18.1206                   | [4]  | I23 (197)         | a = 18.1069                  |
| ZIF-67       | I4-3m (217)        | a = 16.9589                   | [5]  | I23 (197)         | a = 16.8847                  |
| BIF-3Li      | P-43n (218)        | a = 16.0311                   | [6]  | P-43n (218)       | a = 16.0148                  |
| BIF-3Cu      | P-43n (218)        | a = 16.0184                   | [6]  | P-43n (218)       | a = 15.9603                  |

## 1. Adsorption isotherms

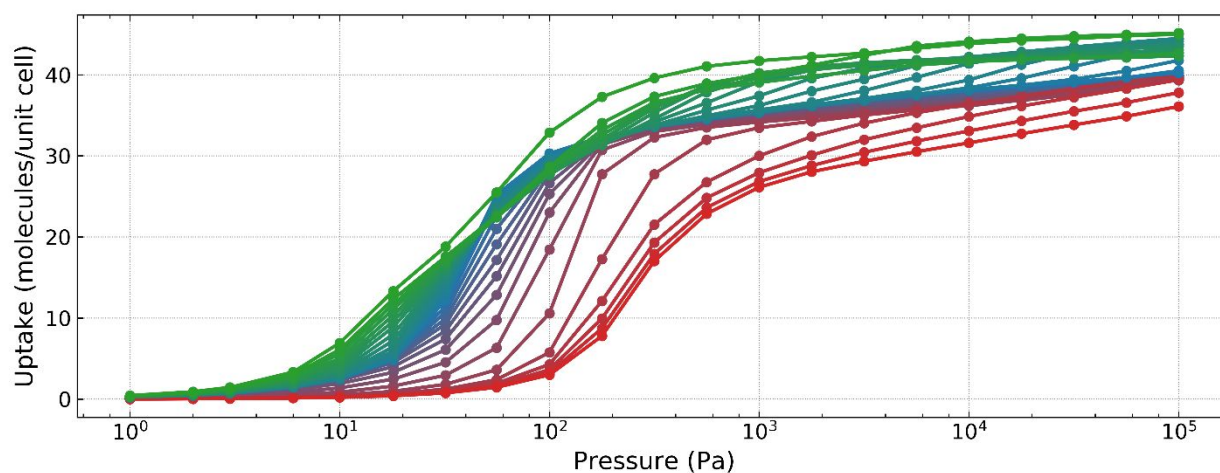

**Figure S1.** N<sub>2</sub> adsorption isotherms in ZIF-8. Blue represents undistorted (optimized) structure. Linear change of isotherm color from blue to green represents structures deformed according to  $\nu_{go2}$  phonon mode and from blue to red -  $\nu_{go1}$ .

Visualizations of all modes related to linker-rotation are available on:

<https://drive.google.com/file/d/1dJs84YrSIUbZhDHBZxpSrP9pmlis7opF/view?usp=sharing>

Visualization of process of construction of accessible surface is available on:

[https://drive.google.com/file/d/1PjjOnvzDR\\_R5XNKMDPXvZ8bN2-pzycQe/view?usp=sharing](https://drive.google.com/file/d/1PjjOnvzDR_R5XNKMDPXvZ8bN2-pzycQe/view?usp=sharing)

## 2. Symmetry of positive and negative deformation of $\nu_{go2}$ mode

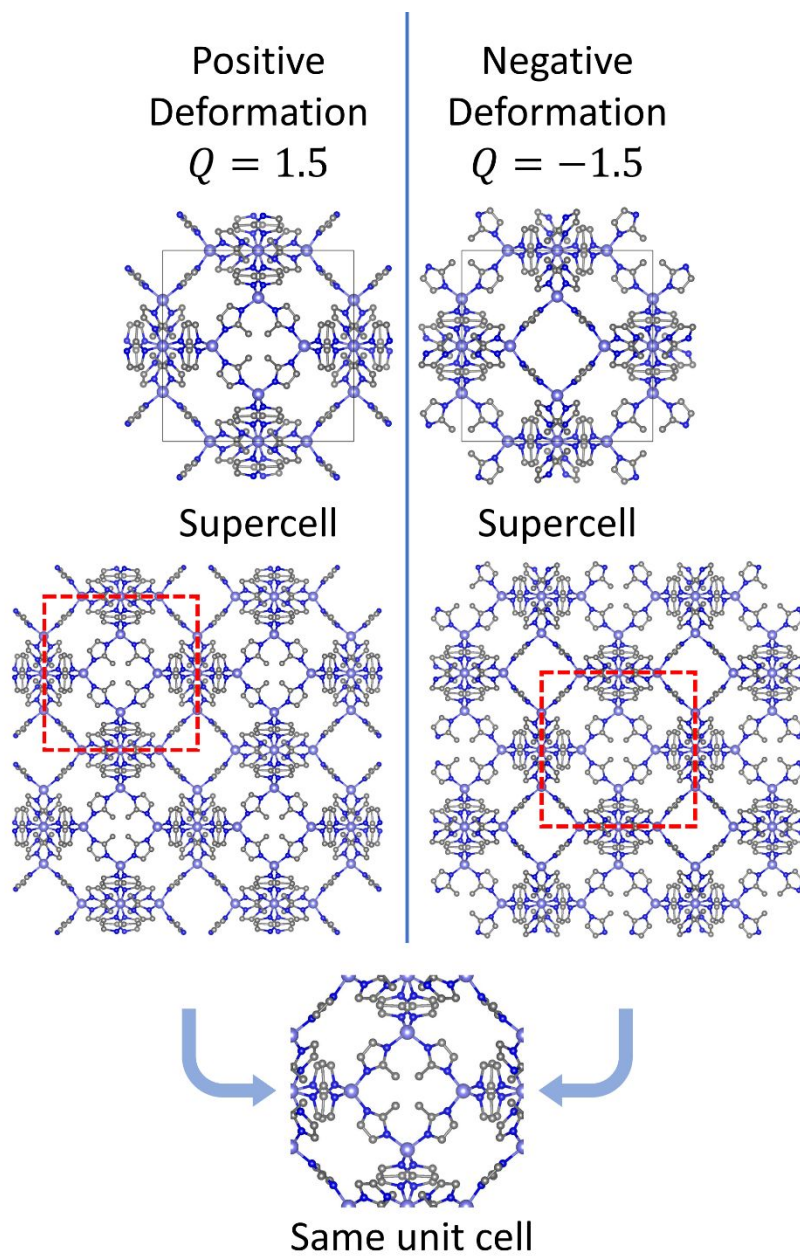

**Figure S2.** Negative and positive deformation related to  $\nu_{go2}$  mode generate a structure with the same unit cell. Structure generated with  $Q = 1.5$  equal to structure generated with  $Q = -1.5$  and transformed by a lattice vector  $\begin{bmatrix} 1 & 1 & 1 \\ 2' & 2' & 2' \end{bmatrix}$ .

### 3. Selection of the SOD-topology structures

We focus our analysis on materials based on ZIF-8 with SOD topology and two types of chemical modifications of the: (i) exchanged linkers with the substituted methyl group and (ii) substituted metal ions in tetrahedrally coordinated metallic center. Table S1 gives crystallographic data of all structures.

SALEM-2 is a framework where the methyl group is replaced by hydrogen atom [7]. Due to smaller van der Waals radius of hydrogen with respect to the methyl group, SALEM-2 exhibits two types of apertures, one related to the 6-member ring (larger than for ZIF-8) and additional to 4-member ring (which is not penetrable in ZIF-8). Gate-opening may result in further broadening of the apertures and to the best of our knowledge its mechanism has not been studied yet.

ZIF-65 possess linker with nitro group ( $-\text{NO}_2$ ) which is known to be highly selective for  $\text{CO}_2$  molecules. Adsorption and desorption of  $\text{N}_2$  in 77 K results in large hysteresis [8] which was suggested to be related to gate-opening although no explicit proof has been found.

Framework with amino ( $-\text{NH}_2$ ) group was also analyzed. This material was not synthesized yet, but the analysis of the influence of this modification on the gate-opening is appealing due to well-known effect of enhancing the affinity to  $\text{CO}_2$ . Theoretical studies of  $\text{CO}_2/\text{CH}_4$  separation showed for instance that the ZIF-96, a RHO-topology framework with amino group shows very high selectivity [9].

Finally, we used ZIF-90, a framework with aldehyde group. Gate-opening was suggested to occur in this material by terahertz spectroscopy [10] and a hysteresis on the  $\text{N}_2$  adsorption isotherm was observed also indicating the presence of this phenomenon [11]. Due to strong polarity, aldehyde groups are good candidates for enhanced  $\text{CO}_2$  capture as well.

We have also selected four systems with different metal ion mass starting from heavy cadmium, through base zinc and slightly lighter cobalt to boron imidazole frameworks (BIFs) with the mixed composition of boron with copper and lithium.

CdIF-1 (cadmium imidazolate framework) was synthesized with cadmium acetate dihydrate which replaced zinc nitrate dihydrate used in ZIF-8 synthesis as the ion source, and 2-methylimidazole as a linker. It was shown that the exchange of the ion causes significant elongation of the M-N (metal-nitrogen) bond, from 2.05 Å to 2.20 Å [4]. The elongation of the cation-nitrogen bonds causes higher degree of the flexibility of the framework such as gate-opening and 6- and 4-member ring breathing. Gate-opening, although not explicitly proven to exist, leaves its footprint on the adsorption isotherm of  $\text{H}_2$  as a step [4].

The other material is ZIF-67 where  $\text{Zn}^{2+}$  is replaced by  $\text{Co}^{2+}$ . Many studies have been published describing this material, covering wide range of potential application such as separation [12], or adsorption and catalysis [13]. Due to the shortening of the M-N bonds, ZIF-67 emerges as material with higher selectivity, which is suggested to be caused by the reduced aperture of the gates [14].

Two remaining materials represents the group of boron imidazolate frameworks (BIFs) [6]. In this framework, the metallic center is occupied by  $\text{B}^{3+}$  and it is coordinated by Melm linkers connected to the center with either  $\text{Li}^+$  (BIF-3\_Li) or  $\text{Cu}^+$  (BIF-3\_Cu). As the system is significantly

lighter than the base material – ZIF-8, and the M-N bonds are shorter, stiffening the framework. It has been shown by Fischer and Bell [15] that the long-range dispersion interactions of the atoms in metallic centers with adsorbed gases is reduced, and therefore it may influence adsorption of nonpolar gases such as  $H_2$  without affecting adsorption of polar gases where the electrostatic interactions are significant, e.g.  $CO_2$ . Nevertheless, there is no systematic studies of the flexibility of those structures related to gate-breathing and gate-opening phenomena.

### 3. Bibliography

- [1] H. Wu, W. Zhou, T. Yildirim, Methane Sorption in Nanoporous Metal–Organic Frameworks and First-Order Phase Transition of Confined Methane, *J. Phys. Chem. C* 113 (2009) 3029–3035.
- [2] O. Karagiaridi, M.B. Lalonde, W. Bury, A.A. Sarjeant, O.K. Farha, J.T. Hupp, Opening ZIF-8: A catalytically active zeolitic imidazolate framework of sodalite topology with unsubstituted linkers, *J. Am. Chem. Soc.* 134 (2012) 18790–18796. doi:10.1021/ja308786r.
- [3] W. Morris, C.J. Doonan, H. Furukawa, R. Banerjee, O.M. Yaghi, Crystals as Molecules : Postsynthesis Covalent Functionalization of Zeolitic Imidazolate Frameworks Crystals as Molecules : Postsynthesis Covalent Functionalization of Zeolitic Imidazolate Frameworks, *J. Am. Chem. Soc.* 130 (2008) 12626–12627. doi:10.1021/ja805222x.
- [4] Y.-Q. Tian, S.-Y. Yao, D. Gu, K.-H. Cui, D.-W. Guo, G. Zhang, Z.-X. Chen, D.-Y. Zhao, Cadmium Imidazolate Frameworks with Polymorphism, High Thermal Stability, and a Large Surface Area, *Chem. - A Eur. J.* 16 (2010) 1137–1141. doi:10.1002/chem.200902729.
- [5] R. Banerjee, A. Phan, B. Wang, C. Knobler, H. Furukawa, M. O’Keeffe, O.M. Yaghi, High-Throughput Synthesis of Zeolitic Imidazolate Frameworks and Application to CO<sub>2</sub> Capture, *Science*. 319 (2008) 939–943. doi:10.1126/science.1152516.
- [6] J. Zhang, T. Wu, C. Zhou, S. Chen, P. Feng, X. Bu, Zeolitic boron imidazolate frameworks, *Angew. Chemie - Int. Ed.* 48 (2009) 2542–2545. doi:10.1002/anie.200804169.
- [7] O. Karagiaridi, W. Bury, J.E. Mondloch, J.T. Hupp, O.K. Farha, Solvent-assisted linker exchange: An alternative to the de novo synthesis of unattainable metal-organic frameworks, *Angew. Chemie - Int. Ed.* 53 (2014) 4530–4540. doi:10.1002/anie.201306923.
- [8] M. Tu, C. Wiktor, C. Rösler, R.A. Fischer, Rapid room temperature syntheses of zeolitic-imidazolate framework (ZIF) nanocrystals, *Chem. Commun.* 50 (2014) 13258–13260. doi:10.1039/C4CC06491G.
- [9] Y. Houndonougbo, C. Signer, N. He, W. Morris, H. Furukawa, K.G. Ray, D.L. Olmsted, M. Asta, B.B. Laird, O.M. Yaghi, A combined experimental-computational investigation of methane adsorption and selectivity in a series of isorecticular zeolitic imidazolate frameworks, *J. Phys. Chem. C*. 117 (2013) 10326–10335. doi:10.1021/jp3096192.
- [10] N.Y. Tan, M.T. Ruggiero, C. Orellana-Tavra, T. Tian, A.D. Bond, T.M. Korter, D. Fairen-Jimenez, J. Axel Zeitler, Investigation of the terahertz vibrational modes of ZIF-8 and ZIF-90 with terahertz time-domain spectroscopy, *Chem. Commun.* 51 (2015) 16037–16040. doi:10.1039/c5cc06455d.
- [11] J. Tharun, K.-M. Bhin, R. Roshan, D.W. Kim, A.C. Kathalikkattil, R. Babu, H.Y. Ahn, Y.S.

- Won, D.-W. Park, Ionic liquid tethered post functionalized ZIF-90 framework for the cycloaddition of propylene oxide and CO<sub>2</sub>, *Green Chem.* 18 (2016) 2479–2487. doi:10.1039/C5GC02153G.
- [12] P. Krokidas, M. Castier, S. Moncho, D.N. Sredojevic, E.N. Brothers, H.T. Kwon, H.K. Jeong, J.S. Lee, I.G. Economou, ZIF-67 Framework: A Promising New Candidate for Propylene/Propane Separation. Experimental Data and Molecular Simulations, *J. Phys. Chem. C.* 120 (2016) 8116–8124. doi:10.1021/acs.jpcc.6b00305.
- [13] G. Zhong, D. Liu, J. Zhang, The Application of ZIF-67 and Its Derivatives: Adsorption, Separation, Electrochemistry and Catalysts, *J. Mater. Chem. A.* 6 (2017) 1887–1899. doi:10.1039/C7TA08268A.
- [14] P. Krokidas, M. Castier, I.G. Economou, Computational Study of ZIF-8 and ZIF-67 Performance for Separation of Gas Mixtures, *J. Phys. Chem. C.* 121 (2017) 17999–18011. doi:10.1021/acs.jpcc.7b05700.
- [15] M. Fischer, R.G. Bell, Interaction of hydrogen and carbon dioxide with sod-type zeolitic imidazolate frameworks: a periodic DFT-D study, *CrystEngComm.* 16 (2014) 1934. doi:10.1039/c3ce42209g.
